# Supplementary material for: Mixed evolutionary origins of endogenous biomass-depolymerizing enzymes in animals
Source: PubMed Central journal article supplement (PMC6011409; doi:10.1186/s12864-018-4861-0), 2018-06-20

A

## CAZy dataset

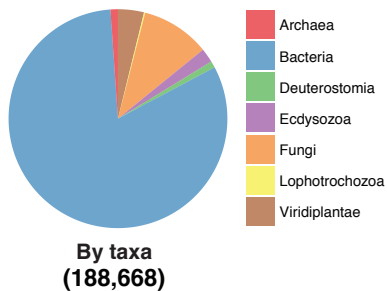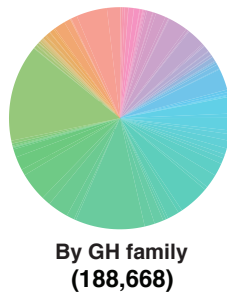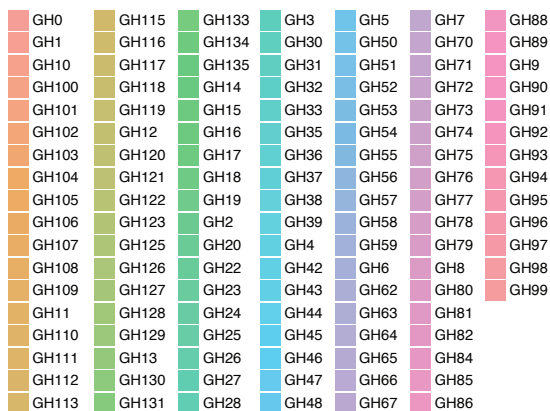

B

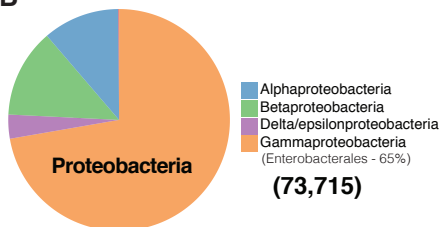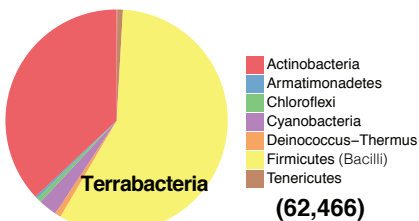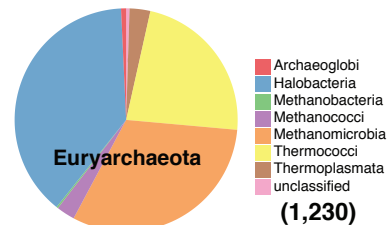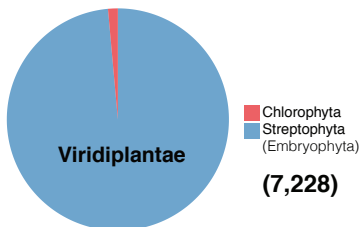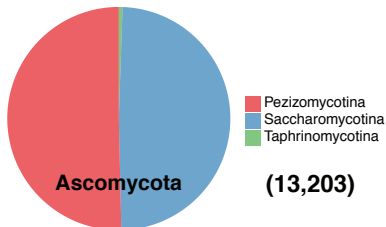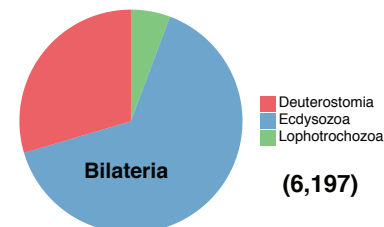

C

## Metazoan genomes

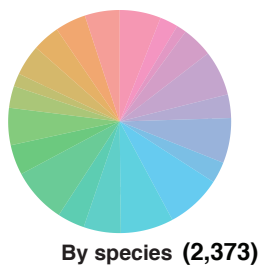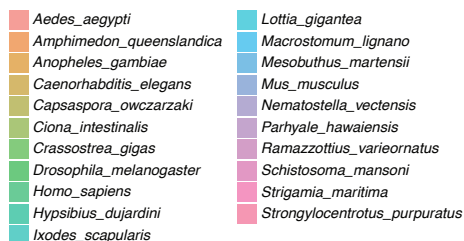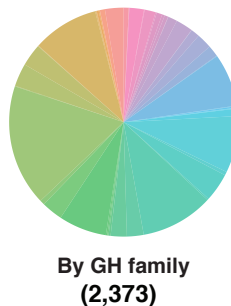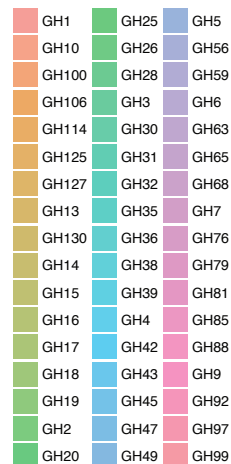

Supplement: 12864_2018_4861_MOESM2_ESM.pdf [file 12864_2018_4861_MOESM2_ESM.pdf]
